# Supplementary material for: Charge generation mechanism tuned via film morphology in small molecule bulk-heterojunction photovoltaic materials
Source: Royal Society of Chemistry journal article supplement (doi:10.1039/d0tc03393f), 2020-01-01
Supplement: d0tc03393f1.pdf [file d0tc03393f1.pdf]

## Supporting Information

### **Charge Generation Mechanism Tuned via Film Morphology in Small Molecule Bulk-Heterojunction Photovoltaic Materials**

Sylvia J. Lou,<sup>1</sup> Stephen Loser,<sup>1</sup> Kyle A. Luck,<sup>1</sup> Nanjia Zhou,<sup>1</sup> Matthew J. Leonardi,<sup>1</sup>  
Amod Timalisina,<sup>1</sup> Eric F. Manley,<sup>1</sup> Dugan Hayes,<sup>2</sup> Joseph Strzalka,<sup>3</sup> Mark C. Hersam,<sup>1,4</sup>  
Robert P.H. Chang,<sup>4</sup> Tobin J. Marks<sup>1\*</sup>, Lin X. Chen<sup>1,2\*</sup>

<sup>1</sup>Department of Chemistry, Northwestern University, Evanston, Illinois 60208, USA

<sup>2</sup>Chemical Science and Engineering Division, <sup>3</sup>X-ray Science Division, Advanced Photon  
Source, Argonne National Laboratory, Lemont, Illinois 60439, USA

<sup>4</sup>Department of Materials Science and Engineering, Northwestern University, Evanston,  
Illinois 60208, USA

1. Grazing incidence x-ray scattering

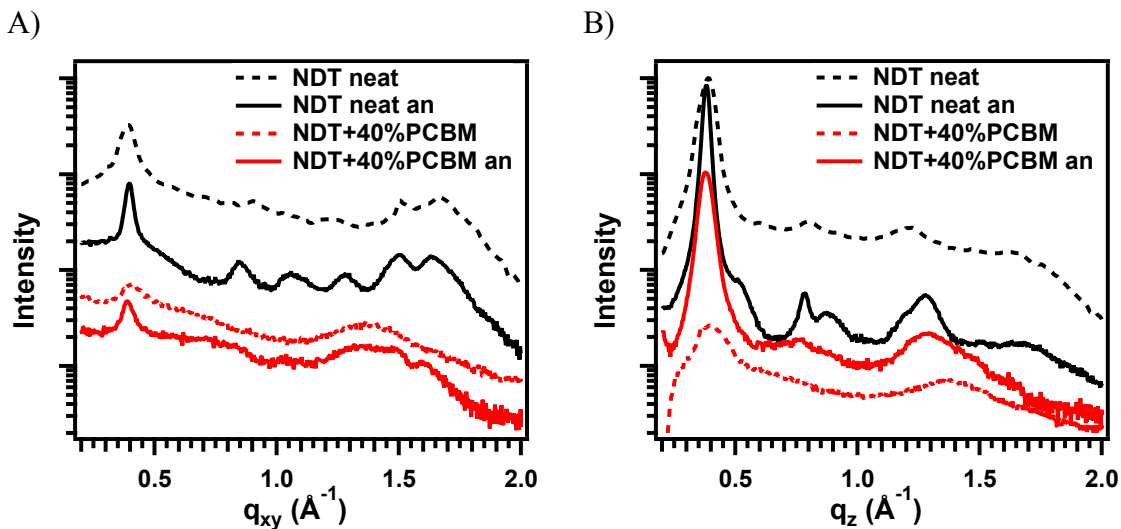

Figure S1. A) In-plane and B) out of plane scattering of neat and NDT+40%PCBM ratios unannealed or annealed at 150°C.

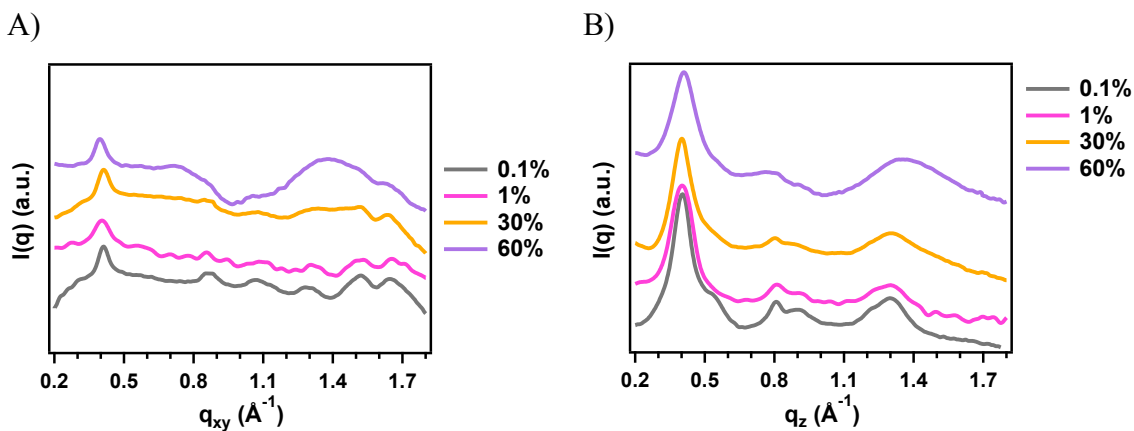

Figure S2. A) Out-of-plane and B) in-plane scattering of NDT with PCBM loadings not shown in the main text (0.1%, 1%, 30%, 60%) to demonstrate similarities in trends.

Table S1. Peak d-spacing and crystalline correlation lengths for in-plane diffraction peaks in the NDT crystal structure at varying loadings of PCBM and corresponding crystalline orientations.

| Peak                        | %PCBM          | <i>d</i> -spacing (Å) | CCL (Å) |
|-----------------------------|----------------|-----------------------|---------|
| (010)<br>side-on and end-on | NDT neat an    | 15.2                  | 194.3   |
|                             | NDT neat no an | 16.2                  | 109.2   |
|                             | 10%            | 15.1                  | 166.8   |
|                             | 20%            | 16.0                  | 174.5   |
|                             | 30%            | 15.2                  | 169.0   |
|                             | 40%            | 15.1                  | 183.7   |
|                             | 40% no an      | 15.5                  | 82.8    |
|                             | 50%            | 15.2                  | 167.9   |
|                             | 60%            | 15.9                  | 151.0   |
|                             | 80%            | 16.1                  | 168.7   |
| (02-1)<br>end-on            | NDT an         | 7.3                   | 36.20   |
|                             | NDT no an      | 6.9                   | 155.49  |
|                             | 10%            | 7.4                   | 33.09   |
|                             | 20%            | 7.5                   | 136.05  |
|                             | 30%            | ---                   | ---     |
|                             | 40%            | 7.2                   | 494.84  |
|                             | 50%            | 7.4                   | 192.96  |
| (02-2)<br>end-on            | NDT an         | 5.8                   | 44.68   |
|                             | 10%            | 6.0                   | 60.40   |
|                             | 20%            | 5.9                   | 46.14   |
| (1-2-1)/(112)<br>side-on    | NDT an         | 4.9                   | 37.02   |
|                             | 10%            | 4.8                   | 24.81   |
| (033)<br>end-on, side-on    | NDT an         | 4.2                   | 63.29   |
|                             | NDT no an      | 4.2                   | 118.76  |
|                             | 10%            | 4.1                   | 73.61   |
|                             | 20%            | 4.2                   | 169.36  |
|                             | 30%            | 4.2                   | 112.65  |
|                             | 40%            | 4.1                   | 159.46  |
|                             | 50%            | 4.1                   | 69.96   |
|                             | 60%            | 4.2                   | 190.93  |
| 80%                         | 4.2            | 202.30                |         |

|                    |           |     |        |
|--------------------|-----------|-----|--------|
| (1-2-4)<br>side-on | NDT an    | 3.8 | 53.91  |
|                    | NDT no an | 3.8 | 42.06  |
|                    | 10%       | 3.8 | 61.68  |
|                    | 20%       | 3.9 | 63.62  |
|                    | 30%       | 3.8 | 82.04  |
|                    | 40%       | 3.8 | 83.67  |
|                    | 50%       | 3.8 | 41.50  |
|                    | 60%       | 3.8 | 106.35 |
|                    | 80%       | 3.9 | 71.49  |

Table S2. Peak d-spacing and crystalline correlation lengths for in-plane diffraction peaks in the NDT crystal structure at varying loadings of PCBM and corresponding crystalline orientations.

| Peak                        | %PCBM     | d-spacing (Å) | CCL (Å) |
|-----------------------------|-----------|---------------|---------|
| (001)<br>side-on and end-on | NDT an    | 15.6          | 211.96  |
|                             | NDT no an | 16.3          | 100.28  |
|                             | 10%       | 15.6          | 211.44  |
|                             | 20%       | 15.6          | 143.38  |
|                             | 30%       | 15.7          | 194.24  |
|                             | 40%       | 15.6          | 160.98  |
|                             | 40% no an | 15.6          | 49.94   |
|                             | 50%       | 15.7          | 152.78  |
|                             | 60%       | 16.4          | 132.74  |
|                             | 80%       | 16.7          | 117.83  |
| (01-2)<br>side-on           | NDT an    | 7.8           | 177.20  |
|                             | NDT no an | 7.9           | 46.00   |
|                             | 10%       | 7.8           | 225.99  |
|                             | 20%       | 8.1           | 228.21  |
| (02-1)<br>side-on           | NDT an    | 7.0           | 58.67   |
|                             | 10%       | 7.1           | 35.30   |
|                             | 20%       | 7.1           | 70.56   |
|                             | 30%       | 7.1           | 144.61  |
|                             | 40%       | 7.0           | 118.00  |
|                             | 50%       | 7.1           | 176.44  |
| (1-1-2)<br>end-on           | 60%       | 6.9           | 161.68  |
|                             | NDT an    | 5.0           | 36.48   |
|                             | NDT no an | 5.2           | 47.06   |
|                             | 10%       | 5.1           | 42.35   |
|                             | 20%       | 4.9           | 52.93   |
| (023)<br>end-on             | 30%       | 4.8           | 35.62   |
|                             | NDT an    | 4.8           | 81.59   |
|                             | NDT noan  | 4.7           | 157.36  |
|                             | 10%       | 4.8           | 58.28   |
|                             | 20%       | 4.7           | 16.94   |
|                             | 30%       | 4.8           | 35.62   |
| 40%                         | 4.8       | 104.85        |         |

## 2. UV-Vis absorption

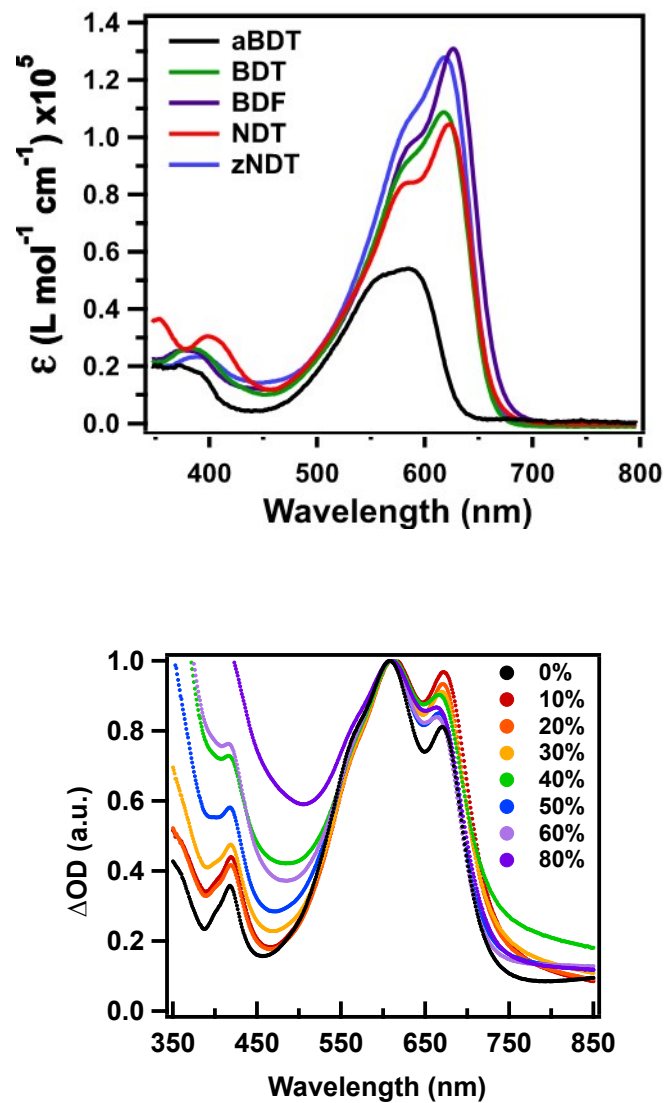

Figure S3. UV-Vis absorption of NDT in  $\text{CHCl}_3$  solution (top) and NDT:PCBM films with varying PCBM loadings (bottom). The top figure is extracted from a previous publication<sup>1</sup> with NDT (red curve) among other spectra.

3. Transient absorption spectroscopy

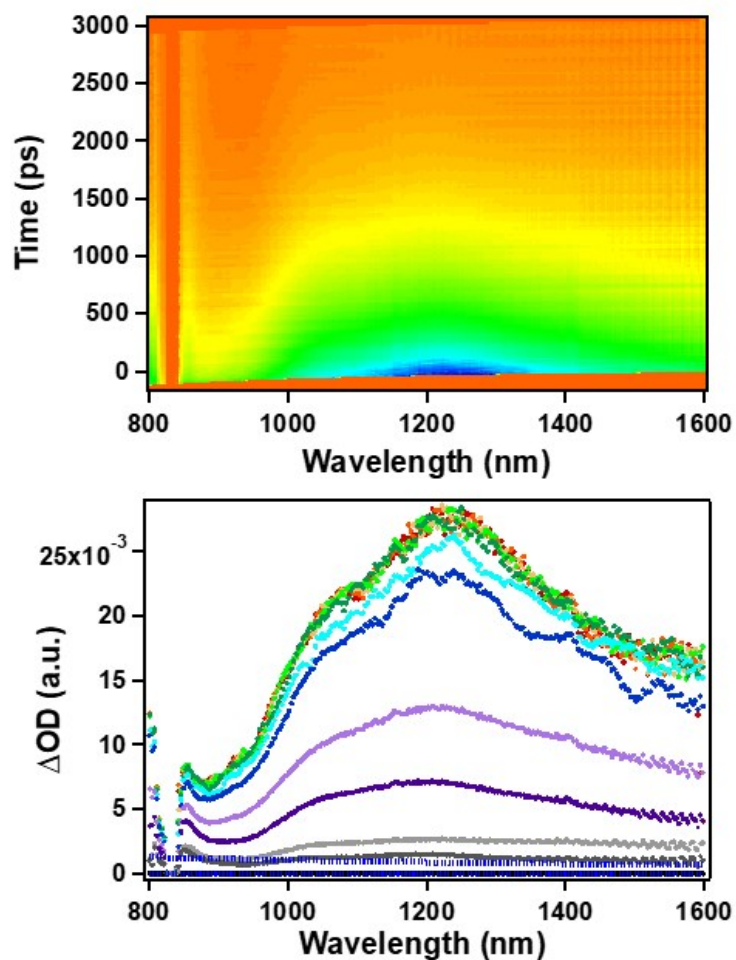

Figure S4. TA spectra of NDT in  $\text{CHCl}_3$ . Top: Two dimensional full TA contour with probe wavelength and delay time; Bottom: TA absorption in NIR region at different delays from 0 – 3 ns extracted from the top contour map.

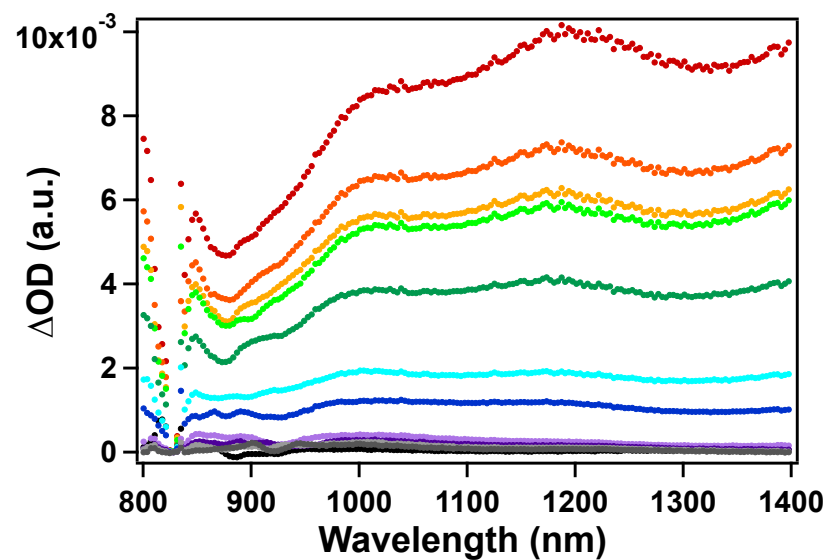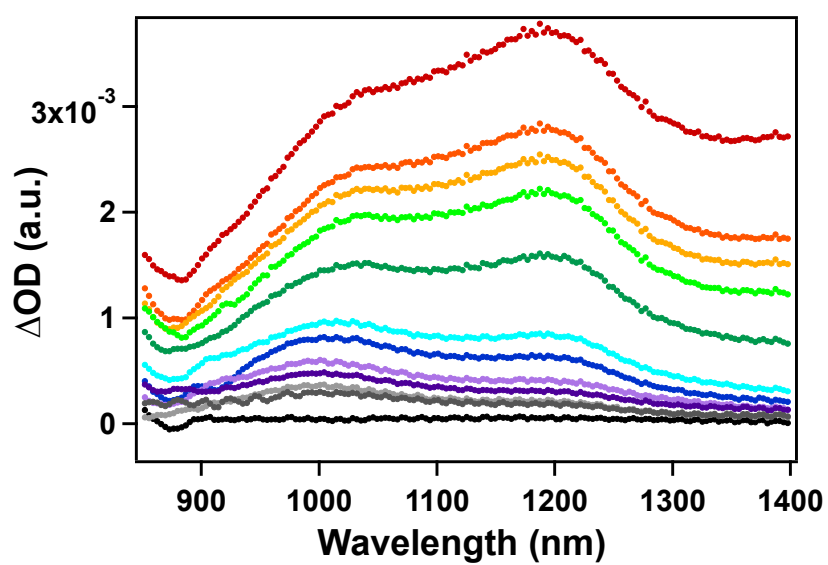

Figure S5. TA spectra of NDT in the 0-3 ns pump-probe delay time window. Top: Neat NDT film, and Bottom: BHJ film with 40% PC<sub>61</sub>BM loading.



Table S3. EX state decay dynamics for all NDT+PCBM films from transient absorption.  
\*unannealed films

| %<br>PCBM | t <sub>1</sub> (ps) | t <sub>2</sub> (ps) | t <sub>3</sub> (ps) | A <sub>1</sub><br>(x10 <sup>-4</sup> ) | A <sub>2</sub><br>(x10 <sup>-4</sup> ) | A <sub>3</sub><br>(x10 <sup>-4</sup> ) |
|-----------|---------------------|---------------------|---------------------|----------------------------------------|----------------------------------------|----------------------------------------|
| 0         | 7.1 (0.3)           | 105.6 (4.6)         | >3000               | 6.8 (0.2)                              | 7.5 (0.2)                              | 2.1 (0.1)                              |
| 0*        | 2.5 (0.1)           | 54.1 (2.3)          | 1829 (303)          | 20 (0.6)                               | 18 (0.4)                               | 0.2 (0.2)                              |
| 0.1       | 6.2 (1.1)           | 58.6 (11.3)         | ---                 | 7.3 (0.7)                              | 4.7 (0.7)                              | ---                                    |
| 1         | 6.0 (0.4)           | 88.0 (4.7)          | ---                 | 7.8 (0.2)                              | 5.5 (0.2)                              | ---                                    |
| 10        | 7.8 (0.4)           | 91.2 (5.4)          | 2240 (145)          | 5.5 (0.2)                              | 6.4 (0.2)                              | 2.4 (0.1)                              |
| 20        | 6.1 (0.6)           | 82.2 (7.8)          | 2365 (237)          | 7.6 (0.5)                              | 8.1 (0.4)                              | 2.7 (0.2)                              |
| 30        | 8.6 (0.5)           | 102.7 (5.5)         | >3000               | 11 (0.3)                               | 10 (0.3)                               | 4.0 (0.1)                              |
| 40        | 6.9 (0.2)           | 96.3 (4.3)          | 2240 (111)          | 5.5 (0.1)                              | 5.1 (0.1)                              | 1.4 (0.1)                              |
| 40*       | 4.9 (0.2)           | 75.9 (5.1)          | >3000               | 15 (0.3)                               | 8.3 (0.3)                              | 4.4 (0.2)                              |
| 50        | 10.9 (0.9)          | 162.6 (22.6)        | >3000               | 12 (0.4)                               | 5.5 (0.4)                              | 2.1 (0.1)                              |
| 60        | 8.7 (0.8)           | 124.6 (14.6)        | >3000               | 8.5 (0.3)                              | 5.1 (0.3)                              | 2.2 (0.1)                              |
| 80        | 5.8 (0.4)           | 85.6 (7.5)          | >3000               | 7.2 (0.3)                              | 7.0 (0.3)                              | 2.1 (0.1)                              |

(1) Loser, S.; Lou, S. J.; Savoie, B. M.; Bruns, C. J.; Timalina, A.; Leonardi, M. J.; Smith, J.; Harschneck, T.; Turrisi, R.; Zhou, N.; Stern, C. L.; Sarjeant, A. A.; Facchetti, A.; Chang, R. P. H.; Stupp, S. I.; Ratner, M. A.; Chen, L. X.; Marks, T. J. Systematic evaluation of structure-property relationships in heteroacene - diketopyrrolopyrrole molecular donors for organic solar cells. *Journal of Materials Chemistry A* **2017**, *5*, 9217-9232.
